# Supplementary material for: Reusable Nano-Zirconia-Catalyzed Synthesis of Benzimidazoles and Their Antibacterial and Antifungal Activities
Source: MDPI journal article supplement (doi:10.3390/molecules26144219), 2021-07-12
Supplement: s1 [file s1]

## Supporting Information

### Reusable Nano- Zirconia- Catalyzed Synthesis of Benzimidazoles and Their Antibacterial and Antifungal Activities

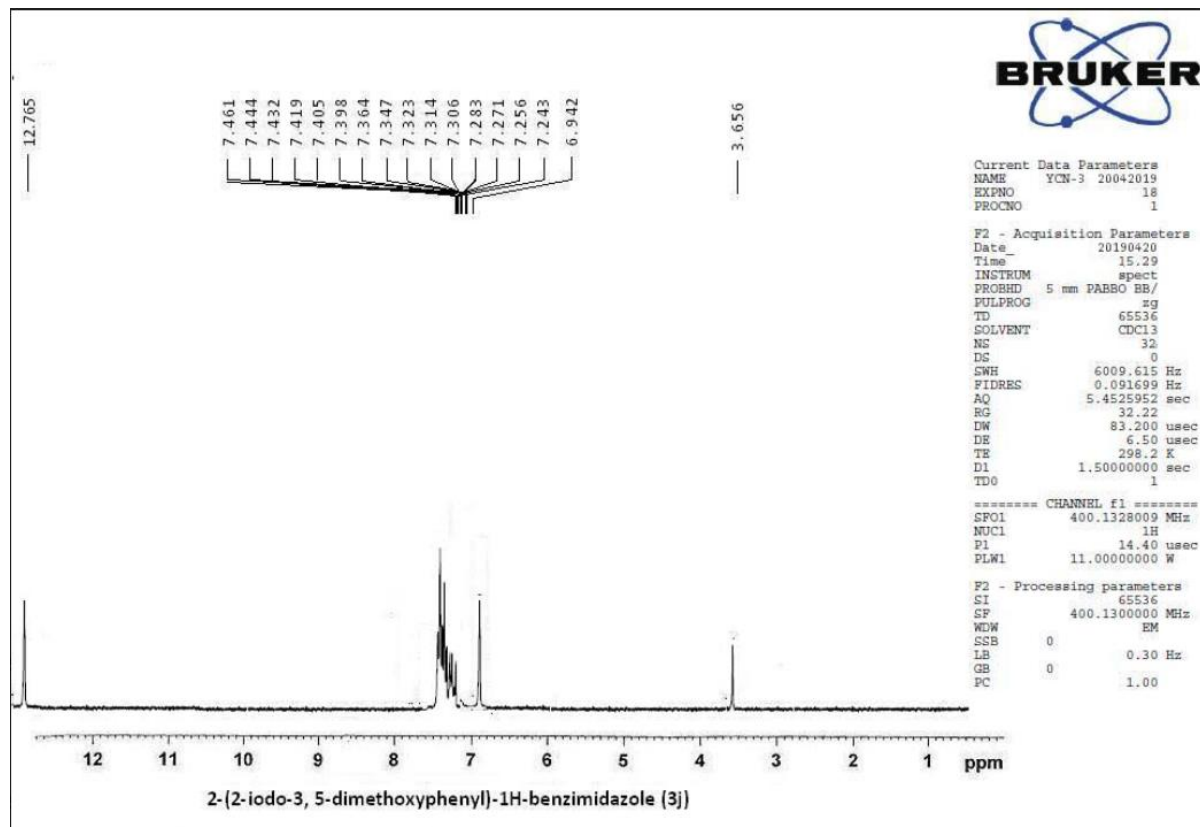

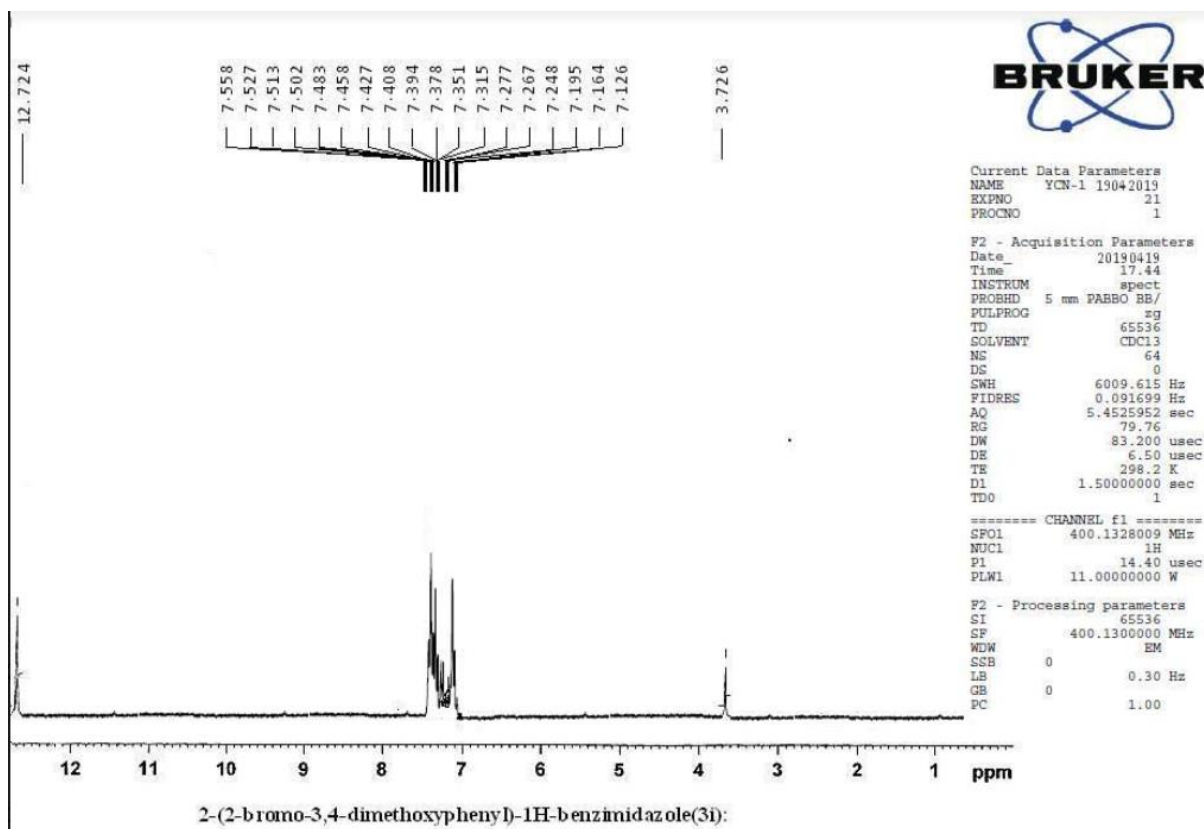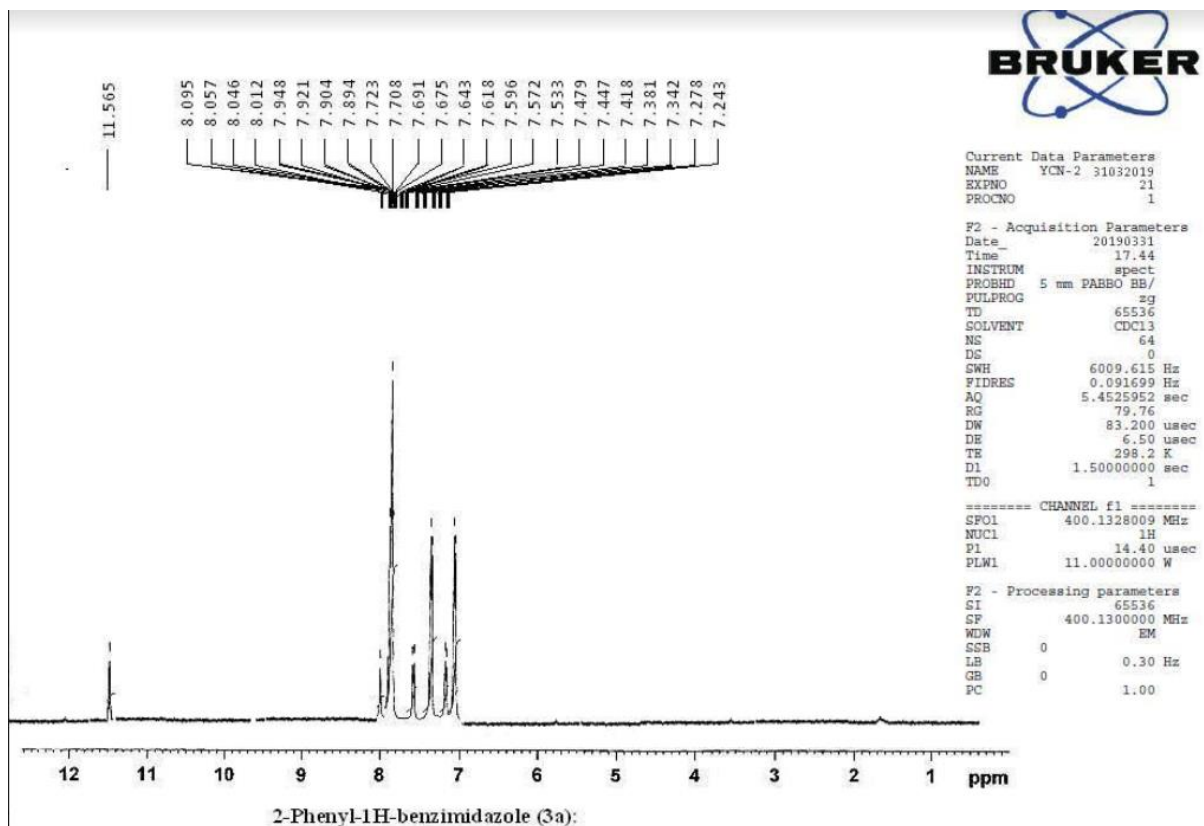

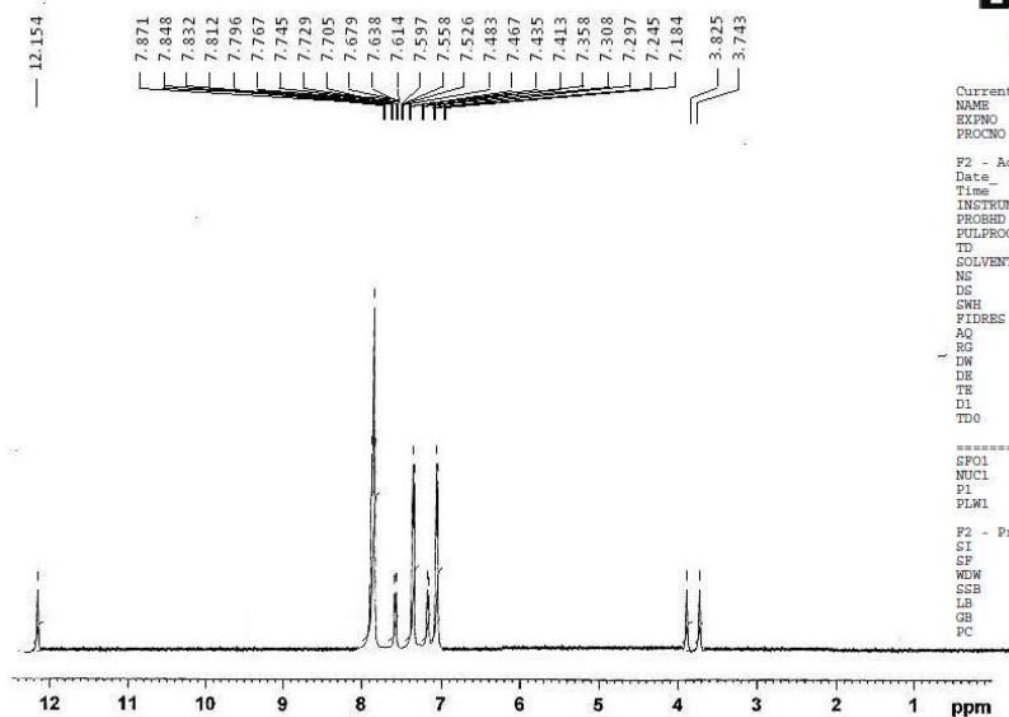

2-(3,5-Dimethoxyphenyl)-1H-benzimidazole (3c):

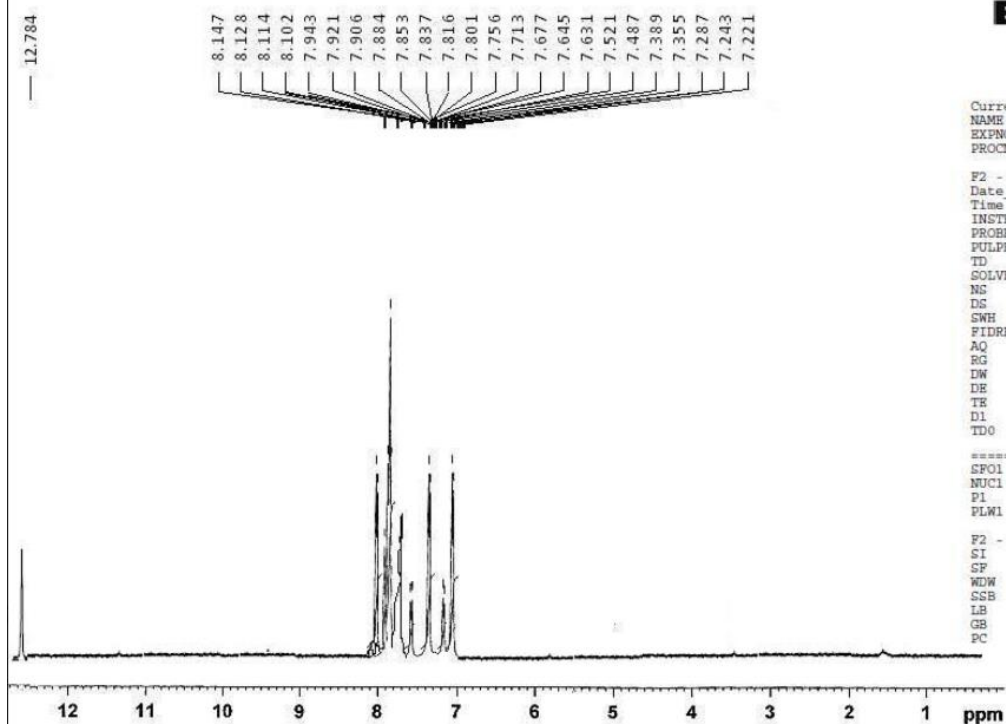

2-(3-Nitrophenyl)-1H-benzimidazole (3h):

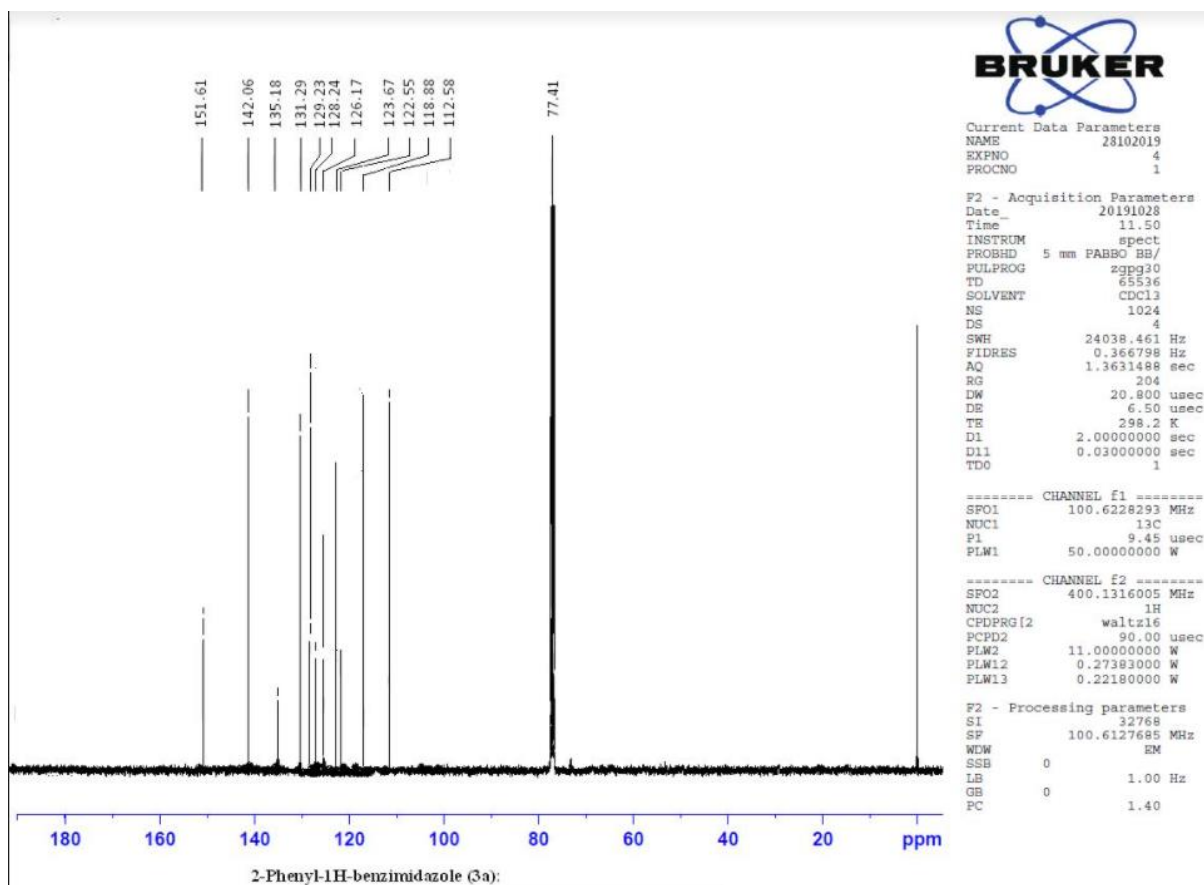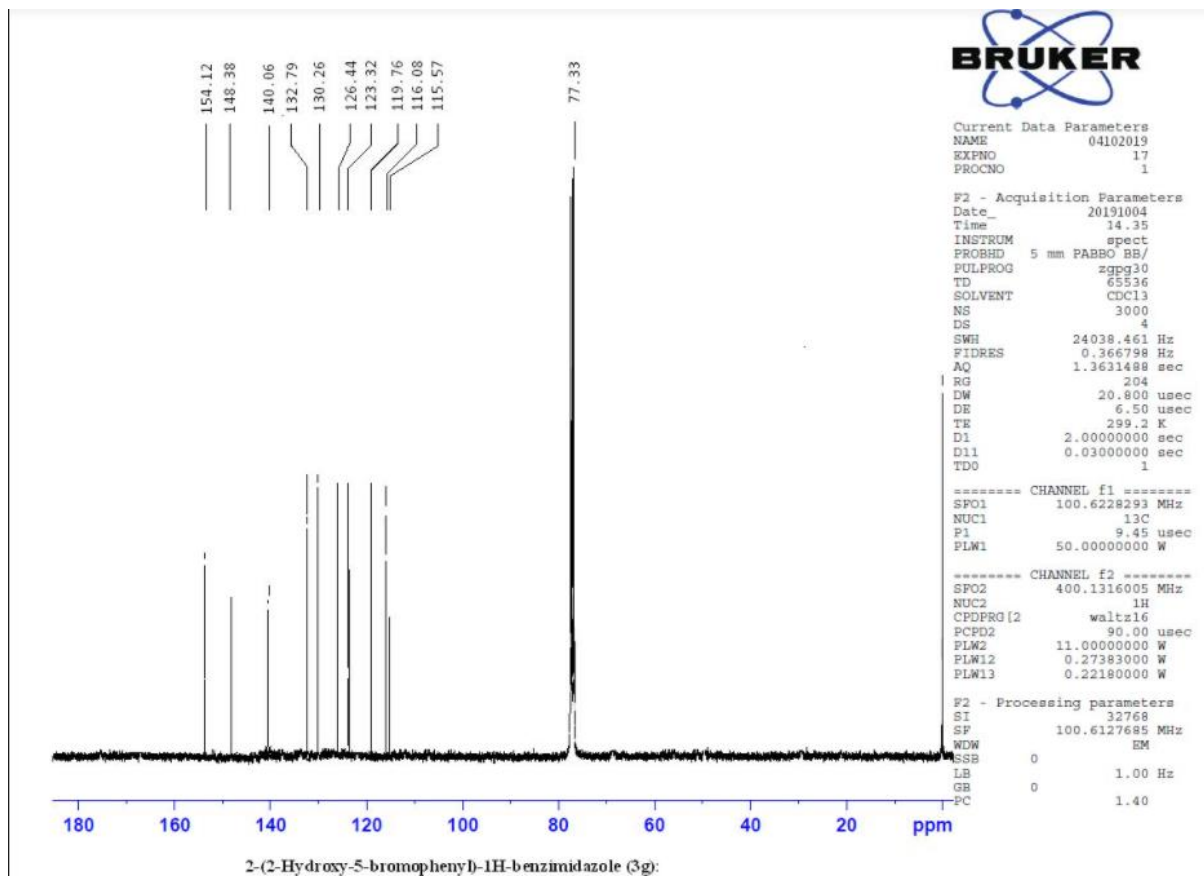

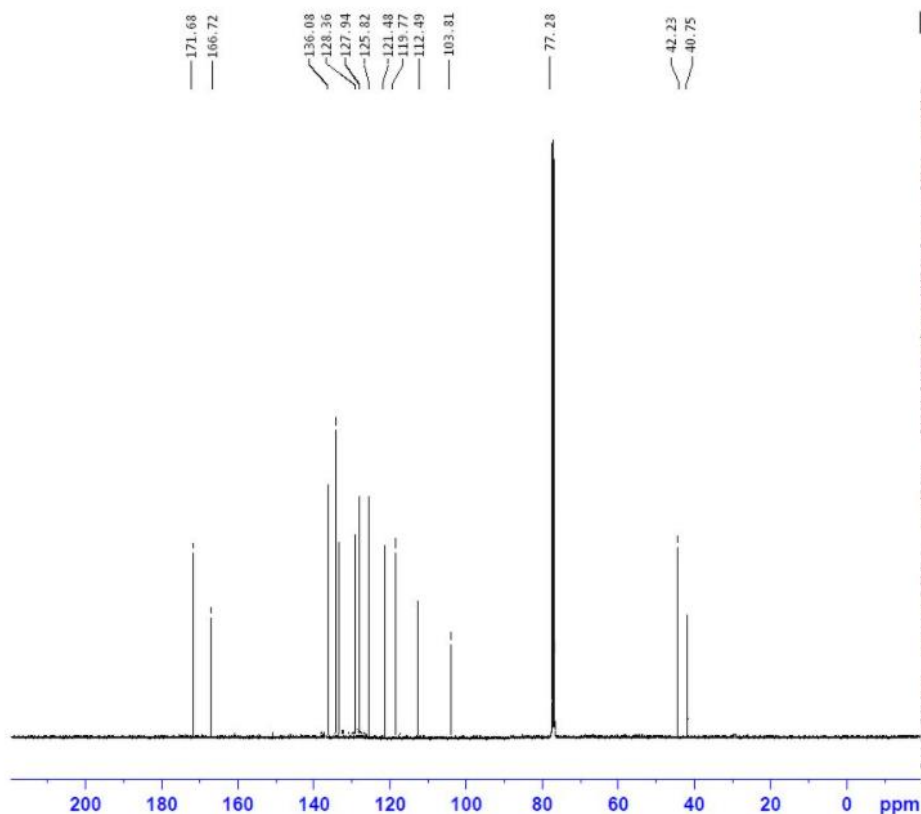

2-(4-methoxyphenyl)-1H-benzimidazole (3b):

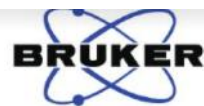

Current Data Parameters  
NAME 29102019  
EXPNO 13  
PROCNO 1

F2 - Acquisition Parameters  
Date 20191029  
Time 19.21  
INSTRUM spect  
PROBHD 5 mm PABBO BB/  
PULPROG zgpg30  
TD 65536  
SOLVENT CDCl3  
NS 4000  
DS 4  
SWH 24038.461 Hz  
FIDRES 0.366798 Hz  
AQ 1.3631488 sec  
RG 204  
DW 20.800 usec  
DE 6.50 usec  
TE 293.6 K  
D1 2.00000000 sec  
D11 0.03000000 sec  
TDO 1

===== CHANNEL f1 =====  
SFO1 100.6228293 MHz  
NUC1 13C  
P1 9.45 usec  
PLW1 50.00000000 W

===== CHANNEL f2 =====  
SFO2 400.1316005 MHz  
NUC2 1H  
CPDPRG2 waltz16  
PCPD2 90.00 usec  
PLW2 11.00000000 W  
PLW12 0.27383000 W  
PLW13 0.22180000 W

F2 - Processing parameters  
SI 32768  
SF 100.6127685 MHz  
WDW EM  
SSB 0  
LB 1.00 Hz  
GB 0  
PC 1.40

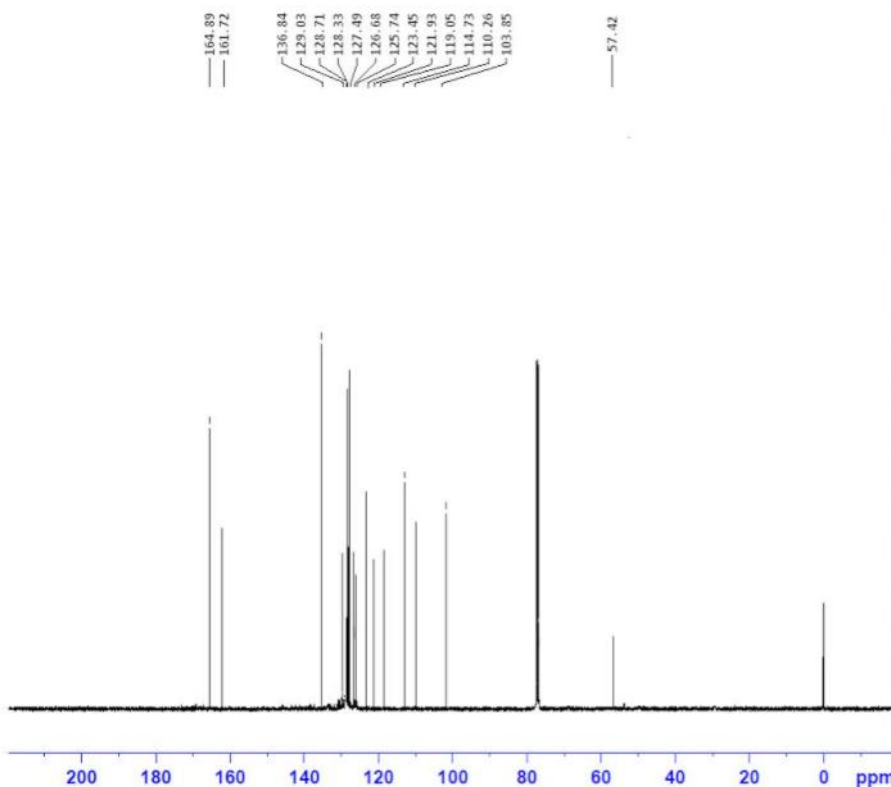

2-(3,5-Dimethoxyphenyl)-1H-benzimidazole

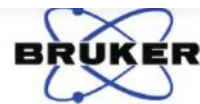

Current Data Parameters  
NAME 01112019  
EXPNO 3  
PROCNO 1

F2 - Acquisition Parameters  
Date 20191101  
Time 11.19  
INSTRUM spect  
PROBHD 5 mm PABBO BB/  
PULPROG zgpg30  
TD 65536  
SOLVENT CDCl3  
NS 1024  
DS 4  
SWH 24038.461 Hz  
FIDRES 0.366798 Hz  
AQ 1.3631488 sec  
RG 204  
DW 20.800 usec  
DE 6.50 usec  
TE 298.1 K  
D1 2.00000000 sec  
D11 0.03000000 sec  
TDO 1

===== CHANNEL f1 =====  
SFO1 100.6228293 MHz  
NUC1 13C  
P1 9.45 usec  
PLW1 50.00000000 W

===== CHANNEL f2 =====  
SFO2 400.1316005 MHz  
NUC2 1H  
CPDPRG2 waltz16  
PCPD2 90.00 usec  
PLW2 11.00000000 W  
PLW12 0.27383000 W  
PLW13 0.22180000 W

F2 - Processing parameters  
SI 32768  
SF 100.6127685 MHz  
WDW EM  
SSB 0  
LB 1.00 Hz  
GB 0  
PC 1.40

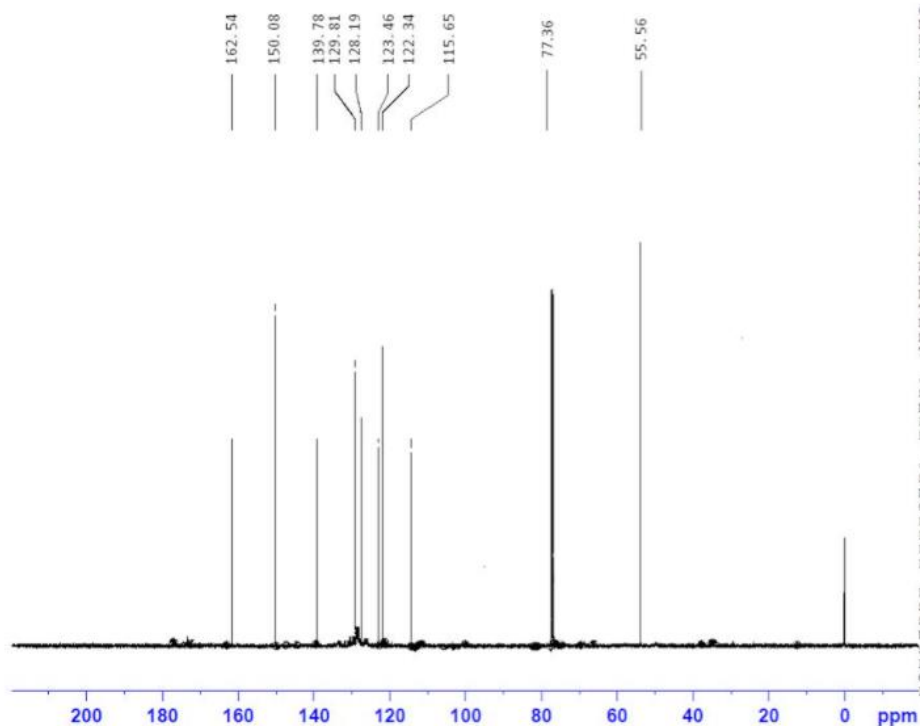

2-(4-methoxyphenyl)-1H-benzimidazole (3b):

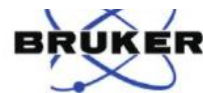

Current Data Parameters  
NAME 01112019  
EXPNO 4  
PROCNO 1

F2 - Acquisition Parameters  
Date\_ 20191101  
Time\_ 14.10  
INSTRUM spect  
PROBHD 5 mm PABBO BB/  
PULPROG zgpg30  
TD 65536  
SOLVENT CDCl3  
NS 1024  
DS 4  
SWH 24038.461 Hz  
FIDRES 0.366798 Hz  
AQ 1.3631488 sec  
RG 204  
DW 20.800 usec  
DE 6.50 usec  
TE 298.1 K  
D1 2.00000000 sec  
D11 0.03000000 sec  
TD0 1

===== CHANNEL f1 =====  
SFO1 100.6228293 MHz  
NUC1 13C  
P1 9.45 usec  
PLW1 50.00000000 W

===== CHANNEL f2 =====  
SFO2 400.1316005 MHz  
NUC2 1H  
CPDPRG2 waltz16  
PCPD2 90.00 usec  
PLW2 11.00000000 W  
PLW12 0.27383000 W  
PLW13 0.22180000 W

F2 - Processing parameters  
SI 32768  
SF 100.6127685 MHz  
WDW EM  
SSB 0  
LB 1.00 Hz  
GB 0  
PC 1.40

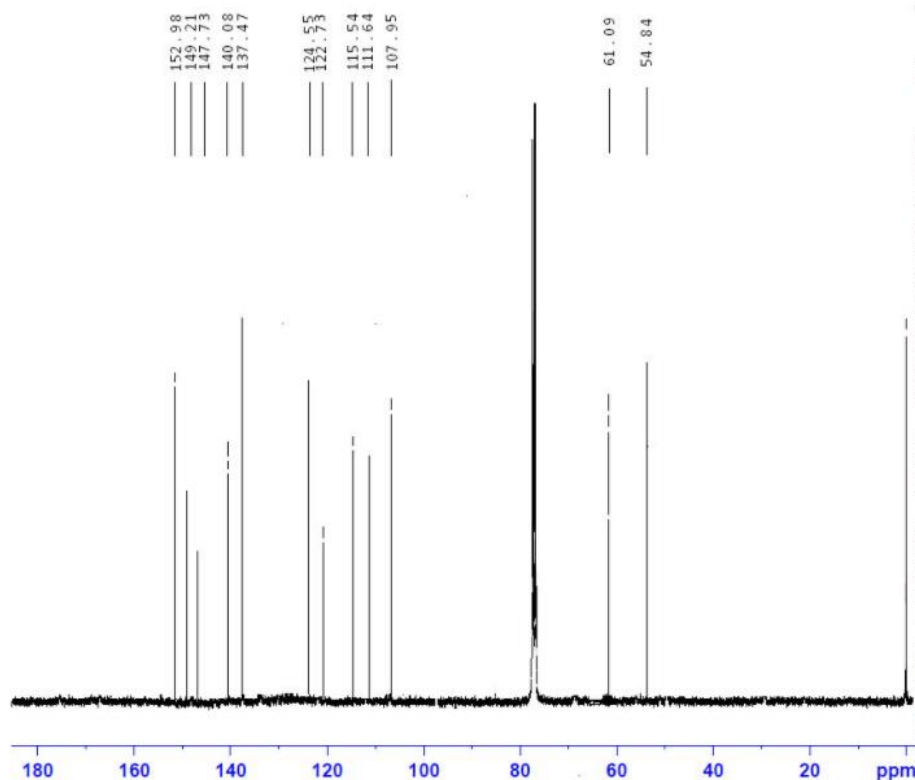

2-(2-bromo-3,4-dimethoxyphenyl)-1H-benzimidazole(3i):

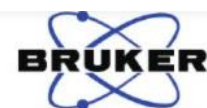

Current Data Parameters  
Date\_ 26102019  
5  
1

F2 - Acquisition Parameters  
Date\_ 20191026  
Time\_ 17.50  
INSTRUM spect  
PROBHD 5 mm PABBO BB/  
PULPROG zgpg30  
TD 65536  
SOLVENT CDCl3  
NS 1004  
DS 4  
SWH 24038.461 Hz  
FIDRES 0.366798 Hz  
AQ 1.3631488 sec  
RG 204  
DW 20.800 usec  
DE 6.50 usec  
TE 298.2 K  
D1 2.00000000 sec  
D11 0.03000000 sec  
TD0 1

===== CHANNEL f1 =====  
SFO1 100.6228293 MHz  
NUC1 13C  
P1 9.45 usec  
PLW1 50.00000000 W

===== CHANNEL f2 =====  
SFO2 400.1316005 MHz  
NUC2 1H  
CPDPRG2 waltz16  
PCPD2 90.00 usec  
PLW2 11.00000000 W  
PLW12 0.27383000 W  
PLW13 0.22180000 W

F2 - Processing parameters  
SI 32768  
SF 100.6127685 MHz  
WDW EM  
SSB 0  
LB 1.00 Hz  
GB 0  
PC 1.40



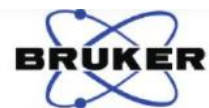

Current Data Parameters  
NAME 02112019  
EXPNO 17  
PROCNO 1

F2 - Acquisition Parameters  
Date\_ 20191102  
Time 15.00  
INSTRUM spect  
PROBHD 5 mm PABBO BB/  
PULPROG zgpg30  
TD 65536  
SOLVENT CDCl3  
NS 3000  
DS 4  
SWH 24038.461 Hz  
FIDRES 0.366798 Hz  
AQ 1.3631488 sec  
RG 204  
DW 20.800 usec  
DE 6.50 usec  
TE 299.2 K  
D1 2.00000000 sec  
D11 0.03000000 sec  
TDO 1

===== CHANNEL f1 =====  
SFO1 100.6228293 MHz  
NUC1 13C  
P1 9.45 usec  
PLW1 50.00000000 W

===== CHANNEL f2 =====  
SFO2 400.1316005 MHz  
NUC2 1H  
CPDPRG2 waltz16  
PCPD2 90.00 usec  
PLW2 11.00000000 W  
PLW12 0.27383000 W  
PLW13 0.22180000 W

F2 - Processing parameters  
SI 32768  
SF 100.6127685 MHz  
WDW EM  
SSB 0  
LB 1.00 Hz  
GB 0  
PC 1.40

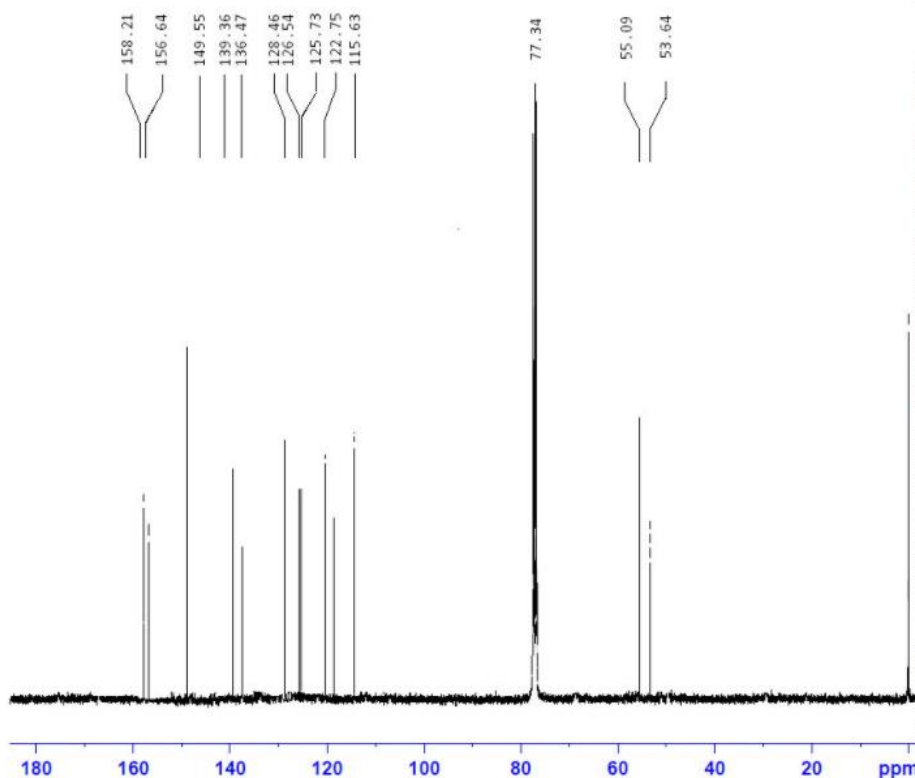

2-(2-iodo-3,5-dimethoxyphenyl)-1H-benzimidazole (3j):
